1  
2  
3  
4  
5  
6  
7  
8  
9  
10  
11  
12  
13  
14  
15  
16  
17  
18  
19  
20  
21  
22  
23  
24  
25  
26  
27  
28  
29  
30  
31  
32  
33  
34

## Endosomal trafficking defects alter neural progenitor proliferation and cause microcephaly

Jacopo A. Carpentieri<sup>1</sup>, Amandine Di Cicco<sup>1</sup>, David Andreau<sup>1</sup>, Laurence Del Maestro<sup>2</sup>, Fatima El Marjou<sup>1</sup>, Laure Coquand<sup>1</sup>, Jean-Baptiste Brault<sup>1</sup>, Nadia Bahi-Buisson<sup>3</sup>, Alexandre D. Baffet<sup>1,4,#</sup>

1- Institut Curie, PSL Research University, CNRS UMR144, 75005 Paris, France

2- Centre Épigénétique et destin cellulaire, Université Paris Diderot, CNRS UMR 7216, 75013 Paris, France

3- INSERM U1163, Institut Imagine, Necker Hospital, 75015 Paris, France

4- Institut national de la santé et de la recherche médicale (Inserm)

# Corresponding author: alexandre.baffet@curie.fr

### Abstract

Primary microcephaly and megalencephaly are severe brain malformations defined by reduced and increased brain size, respectively. Whether these two pathologies arise from related alterations at the molecular level is unclear. Microcephaly has been largely associated with centrosomal defects, leading to cell death. Here, we investigated the consequences of *WDR81* loss of function, which cause severe microcephaly in patients. We show that WDR81 regulates endosomal trafficking of EGFR, and that loss of function leads to reduced MAP kinase pathway activation. Mouse radial glial progenitor cells knocked-out for *WDR81* display reduced proliferation rates, leading to reduced brain size. These proliferation defects are rescued *in vivo* by the expression of megalencephaly-causing mutated Cyclin D2. Our results identify the endosomal machinery as an important regulator of RG cell proliferation rates and brain growth. They demonstrate that microcephaly and megalencephaly can be due to opposite effects on the proliferation rate of radial glial progenitors.

## 35 **Introduction**

36           Development of the neocortex relies on neural stem cells called radial glial (RG) cells, that  
37 generate the majority of cortical neurons<sup>1</sup>. Neuronal production is restricted to a short period during  
38 which all excitatory neurons are produced<sup>2</sup>. This leaves little room for compensatory mechanisms to  
39 occur, and alterations during this critical period lead to brain malformations<sup>3</sup>. Indeed, the developing  
40 neocortex is highly sensitive to perturbations, and a large number of mutations have been described  
41 to specifically alter its growth, but not that of other organs<sup>4</sup>.

42           Primary microcephaly is a severe neurodevelopmental disorder characterized by a head  
43 circumference that is more than 3 standard deviations (SD) below the mean<sup>5</sup>. The major molecular  
44 cause of microcephaly lies in defects in centrosomal number<sup>6,7</sup>, maturation<sup>8</sup> and mitotic spindle  
45 regulation<sup>9-11</sup>, leading to apoptotic cell death. In fact, apoptosis appears to be the leading cause of  
46 microcephaly in animal models, irrespective of the upstream affected molecular pathway<sup>12-14</sup>.  
47 Reduced proliferation rates of progenitors, while proposed to be a putative cause of microcephaly<sup>15</sup>,  
48 has received much less experimental support. One notable example is the gene encoding IGFR1,  
49 which is mutated in syndromic forms of microcephaly, and when deleted in mouse leads to reduced  
50 proliferation and small brain size<sup>16,17</sup>.

51           On the opposite end of the spectrum, megalencephaly (MEG) is a neuronal disorder  
52 characterized by brain overgrowth (3 SD over the mean)<sup>18</sup>. The causes of megalencephaly are diverse,  
53 but activating mutations in the Pi3K-AKT-mTOR and the Ras-MAPK pathways have been identified  
54 as important underlying events<sup>19-21</sup>. Mouse and cerebral organoid models for these activated pathways  
55 demonstrated increased proliferation of radial glial cells leading to tissue overgrowth<sup>22-24</sup>. Stabilizing  
56 mutations in the downstream target Cyclin D2 were also reported, and its ectopic expression in mouse  
57 brain stimulated progenitor proliferation<sup>25</sup>.

58           The EGF receptor (EGFR) and its ligands are major regulators of tissue growth<sup>26</sup>.  
59 Accordingly, knock-out of EGFR leads to a dramatic atrophy of the cerebral cortex<sup>27</sup>. Progenitor cells  
60 appear to become responsive to EGF at mid-neurogenesis, while at earlier stages they rather exhibit  
61 FGR2 dependence<sup>28</sup>. Endosomal trafficking of EGFR plays a major role in the regulation of its  
62 activity: while most EGFR signaling is believed to occur at the plasma membrane, internalization of  
63 EGFR is critical for signal termination<sup>29</sup>. Following endocytosis, internalized cargos follow different  
64 trafficking routes including recycling towards the plasma membrane or delivery to lysosomes for  
65 degradation<sup>30</sup>. Phosphatidylinositols (PtdIns) are major regulators of this process, defining endosomal  
66 compartment identity. Early endosomes are characterized by the presence of the small GTPase RAB5  
67 and PtdIns3P, and late endosomes by RAB7 and PtdIns(3,5)P<sub>2</sub><sup>31</sup>. Recently, WDR81 and its partner  
68 WDR91 were shown to act as negative regulators of class III phosphatidylinositol 3-kinase (PI3K)-

69 dependent PtdIns3P generation, therefore promoting early to late endosomal conversion<sup>32</sup>. In WDR81  
70 knock-out (KO) HeLa cells, endosomal maturation defects led to delayed EGFR degradation<sup>32</sup>.

71 We recently reported compound heterozygous mutations in the human *WDR81* gene, that  
72 result in extreme microcephaly associated with reduced gyrification of the neocortex<sup>33</sup>. Here, we  
73 generated a mouse knock-out model that largely recapitulates the human phenotype. Mutant brains  
74 are not only smaller but also display altered neuronal layering. We demonstrate that microcephaly is  
75 the result of reduced proliferation rates of radial glial progenitors, but not of cell death.  
76 Mechanistically, we show that WDR81 mutation delays EGFR endosomal trafficking and leads to  
77 reduced activation of the MAPK signaling pathway. These proliferation defects can be rescued by  
78 expressing a megalencephaly-causing mutated cyclin D2, indicating that microcephaly and  
79 megalencephaly can be due to opposite effects of the proliferation rates of radial glial cells.

80

81

## 82 **Results**

### 83 **WDR81 KO mice display reduced brain size and altered neuronal positioning**

84 In mice, two WDR81 isoforms have been identified. A long isoform (210 kDa) encompassing  
85 an N-terminal BEACH domain, a central transmembrane region, and a C-terminal WD40 repeat  
86 domain; and a shorter isoform (81 kDa) lacking the BEACH domain (**Figure 1A**). Measurements of  
87 mRNA isolated from embryonic E14.5 cortex extracts indicated that the long WDR81 isoform was  
88 highly dominant, with only trace levels of the short isoform (**Figure 1B**). We generated two WDR81  
89 KO mice using gRNAs targeting the beginning of exon 1 (KO-1, affecting isoform 1), and the end of  
90 exon 1 (KO-2, affecting both isoforms) (**Figure 1A**). Both lines displayed frameshifts leading to the  
91 appearance of a premature STOP codon (**Figure S1A**). QPCR measurements in KO1 did not reveal  
92 any upregulation of isoform 2, indicating an absence of compensation (**Figure 1B**). Moreover, a  
93 strong reduction of isoform 1 mRNA levels was observed, likely due to non-sense mRNA decay  
94 (**Figure 1B**). WDR81 homozygote mutant embryos and pups were detected at sub-mendelian rates,  
95 and did not live for more than 21 days (**Figure S1B**).

96 We then analyzed brain size and organization in P7 WDR81<sup>-/-</sup> pups. Both KO lines were  
97 severely microcephalic, with a reduced hemisphere area (**Figures 1C and 1E**). Cortical thickness  
98 was also greatly reduced (by ~54%), suggesting defects both in tangential and radial expansion of the  
99 brain (**Figures 1D and 1F**). We next analyzed neuronal positioning in WDR81<sup>-/-</sup> P7 cortices. The  
100 localization of upper layer late-born neurons was severely affected, with a large number of CUX-1-  
101 positive neurons dispersed throughout the cortex (**Figure 1G**). Deeper neurons, which are born earlier  
102 during cortical development were however correctly positioned, as indicated by the localization of

103 CTIP-2-positive neurons (**Figure 1H**). Overall, mice knocked out for WDR81 have reduced brain  
104 size and altered neuronal positioning, largely recapitulating the microcephaly and lissencephaly  
105 phenotypes reported in humans. These phenotypes were observed for both WDR81 KO lines and we  
106 therefore next focused our analysis on KO-1 (referred to as WDR81<sup>-/-</sup> from here on).

107

### 108 **WDR81 KO alters radial glial progenitor proliferation**

109 To identify the causes of reduced brain size in WDR81<sup>-/-</sup> pups, we tested for alterations of  
110 neocortex development at embryonic stages. To test for proliferation defects, we first measured the  
111 mitotic index of WDR81<sup>-/-</sup> radial glial progenitors, as defined by the percentage of phospho-Histone  
112 H3 (PH3)-positive cells out of total PAX6-positive cells. While at E12.5, proliferation appeared  
113 normal, mitotic index of WDR81<sup>-/-</sup> radial glial progenitors was severely reduced at E14.5 and E16.5  
114 (**Figure 2A**). Strikingly, TBR2-positive intermediate progenitors appeared to cycle normally  
115 throughout development (**Figure 2B**). Therefore, WDR81 mutation specifically alters proliferation  
116 of radial glial progenitors at mid and late neurogenic stages. We next analyzed further these  
117 proliferation defects and measured the percentage of cells in S phase. A 30-minute BrdU pulse  
118 revealed an increased amount of WDR81<sup>-/-</sup> radial glial progenitors in S-phase (**Figures 2C and 2D**).  
119 To test whether this was due to a longer duration of S-phase, we performed a double BrdU-EdU pulse,  
120 in order to measure the rate of S-phase exit. Mice were first injected with BrdU, followed by a second  
121 injection with EdU 4 hours later. This assay revealed a decreased proportion of cells that exited S  
122 phase (BrdU<sup>+</sup>/EdU<sup>-</sup>) in WDR81<sup>-/-</sup> brains, indicating a longer S phase in mutant radial glial  
123 progenitors (**Figures 2E and 2F**).

124 An alternative potential cause of reduced brain size is premature differentiation of progenitor  
125 cells. To test this, embryonic cortices were stained for PAX6 (radial glial progenitors), TBR2  
126 (intermediate progenitors) and NEUN (neurons) at different developmental stages and the proportion  
127 of each cell population was measured. We did not observe any decrease in the proportion of  
128 progenitors out of the total cell population throughout development indicating they did not  
129 prematurely differentiate (**Figure 2G**). In fact, we even detected a reduction of the proportion of  
130 neurons at mid and late neurogenesis (**Figure 2G**). Finally, we analyzed apoptotic cell death in  
131 WDR81<sup>-/-</sup> cortices. Staining for cleaved caspase-3 (CC3) did not reveal any increased apoptosis,  
132 which remained almost undetectable both in WT and mutant embryos (**Figure 2H**). Therefore,  
133 reduced brain size in WDR81<sup>-/-</sup> mice is not the result of premature progenitor differentiation or  
134 increased apoptotic cell death, but appears to be a consequence of reduced radial glial progenitor  
135 proliferation rates.

136

## 137 **Reduced proliferation and EGFR signaling in WDR81 patient cells**

138 We next tested whether similar proliferation defects could be observed in patient cells mutated  
139 for WDR81. Two mutant primary fibroblast lines, derived from skin biopsies, were analyzed and  
140 compared to two control fibroblast lines. The mitotic index of both patient cells was strongly  
141 decreased, mimicking the mouse radial glial progenitor phenotype (**Figures 3A and 3B**). As an  
142 alternative measurement of proliferation, cells were stained for Ki67, which also revealed a  
143 substantial decrease for both patient cell lines (**Figures 3C and 3D**).

144 In radial glial progenitors, we detected proliferation defects from mid-neurogenesis (**Figure**  
145 **2A**), which fits with the time when these cells start responding to EGF<sup>28</sup>. This observation suggested  
146 a potential alteration in the EGFR signaling pathway. In order to test this, we monitored the activity  
147 of this signalling pathway in control and patient fibroblasts. Strikingly, we observed that the protein  
148 levels of EGFR itself were drastically reduced in both patient cell lines (**Figures 3E and 3F**). We  
149 next measured the activation of the mitogen-activated protein kinase (MAPK) signaling pathway in  
150 response to EGF stimulation. Consistent with the decreased levels of EGFR, the phosphorylation of  
151 ERK was reduced in both patient fibroblasts following an EGF pulse (**Figures 3G-I and S2**).  
152 Therefore, WDR81 patient cells display reduced EGFR levels, leading to a reduced activation of the  
153 MAPK signalling pathway upon EGF stimulation.

154 The levels of EGFR are known to be tightly regulated, through complex feedback loops and  
155 the balance between recycling and degradation of the internalized receptor<sup>34</sup>. We therefore asked  
156 whether reduced EGFR levels were a consequence of defects within the EGFR pathway itself. To test  
157 this, we EGF-starved cells and measured the levels of EGFR 24 hours later. In patient cells, starvation  
158 rescued EGFR levels to the ones of control cells (**Figures 3J and 3K**). These results indicate that  
159 reduced EGFR levels are only seen when the pathway is activated. Given that EGFR internalization  
160 upon EGF binding is a major regulator of the pathway, this data points towards intracellular  
161 processing defects of EGFR.

## 163 **WDR81 is required for endosomal trafficking of EGFR**

164 WDR81 is known to regulate endosomal maturation as well as autophagic clearance of  
165 aggregated proteins (aggrephagy)<sup>32,35</sup>. Importantly, these two functions are independent and act via  
166 the WDR81 specific binding partners WDR91 and p62, respectively. We therefore tested whether  
167 one of these factors affected neocortex development similarly to WDR81. To perform this, we *in*  
168 *utero* electroporated shRNA-expressing constructs for WDR81, WDR91 and p62 in E13.5  
169 developing brains and analyzed cell distribution at E17.5. Consistent with the KO data, WDR81  
170 knock-down (KD) strongly affected neurodevelopment (**Figures 4A and 4B**). In particular, a large

171 fraction of KD cells accumulated in the intermediate zone (IZ), at the expense of the germinal zones  
172 and cortical plate. This phenotype was phenocopied by WDR91 KD, but not by p62 KD which did  
173 not appear to affect cell distribution (**Figures 4A and 4B**). These results support the endosomal  
174 function of WDR81 as a critical player for proper neocortex development.

175 We next tested whether endosomal defects could be observed in WDR81 KO radial glial  
176 progenitors. Staining for various endolysosomal compartments revealed a specific alteration of  
177 EEA1+ early endosomes, which appeared strongly enlarged (**Figure 4C**). Quantification of their size  
178 confirmed this observation, revealing a 63% average increase (**Figure 4E**). To test whether this is a  
179 conserved feature of WDR81 patient cells, we measured early endosome size in mutant fibroblasts.  
180 Again, EEA1+ endosomes were found to be swollen, with an increased proportion of large endosomes  
181 ( $>0,5 \mu\text{m}$ ) (**Figures 4D and 4F**). These results are consistent with previous observation made in KO  
182 HeLa cells and demonstrating a role for WDR81 in negative regulation of Class III Pi3K<sup>32</sup>.

183 Because these endosomal defects are a potential cause of altered EGFR signaling, we next  
184 tested whether EGFR endosomal trafficking was affected in WDR81 mutant cells. Cells were first  
185 starved for 24 hours to restore EGFR to the levels of control cells, and subsequently pulsed with  
186 fluorescent EGF<sup>555</sup>, to monitor internalization and clearance of EGF-bound EGFR. In both patient  
187 cells, EGF<sup>555</sup> was shown to accumulate longer within EEA1+ early endosomes (**Figure 4G**).  
188 Quantification of the colocalization between EGF<sup>555</sup> and EEA1 revealed that this delay was  
189 particularly important 120 minutes after EGF internalization (**Figure 4H**). Therefore, WDR81 is  
190 critical for endosomal homeostasis and trafficking of internalized EGFR following EGF binding.

191

### 192 **Megalencephaly-causing mutation rescues progenitor proliferation in WDR81 mutant brains**

193 Our results indicate that trafficking defects of EGFR can arise from mutations in WDR81,  
194 and lead to reduced activation of the MAPK signaling pathway. They further show that reduced radial  
195 glial progenitor proliferation is a cause of primary microcephaly. Megalencephaly is characterized by  
196 brain overgrowth and can be due to increased cell proliferation during development<sup>18</sup>. Major causes  
197 include gain-of-function mutations in AKT3 and its downstream target Cyclin D2<sup>25,36</sup>. Together, these  
198 data suggest that microcephaly and megalencephaly can be the consequence of opposite effects on  
199 the proliferation rates of radial glial progenitors. To further test this, we analyzed the effect of a  
200 megalencephaly-causing Cyclin D2<sup>Thr280Ala</sup> mutant on the proliferation of WDR81 KO radial glial  
201 progenitor. Degradation-resistant Cyclin D2<sup>Thr280Ala</sup>, WT Cyclin D2 or a control vector were  
202 expressed using *in utero* electroporation in WT and WDR81-mutant mice brains at E 14.5, and the  
203 mitotic index of PAX6 cells was measured at E16.5. Following expression of the control empty  
204 vector, we confirmed the reduced mitotic index in WDR81<sup>-/-</sup> brains (**Figures 5A and 5B**). Moreover,

205 expression of Cyclin D2<sup>Thr280Ala</sup> in WT brain increased mitotic index, indicating that this  
206 megalencephaly-causing mutation indeed stimulates radial glial progenitor proliferation rates  
207 (**Figures 5A and 5B**). Strikingly, expression of degradation-resistant Cyclin D2<sup>Thr280Ala</sup> in WDR81<sup>-/-</sup>  
208 brains rescued the mitotic index reduction (**Figures 5A and 5B**). WT cyclin D2 was also able to  
209 rescue proliferation, although to a lesser extent, indicating that large amounts of this protein, either  
210 due to overexpression or impaired degradation is able to restore proliferation (**Figures 5A and 5B**).  
211 Together, these results indicate that a megalencephaly-causing mutation can overcome the effect of  
212 a microcephaly-causing mutation on the proliferation of radial glial progenitors. These two  
213 pathologies can therefore arise from a highly related cause: an imbalance in cell cycle regulation  
214 leading either to reduced brain growth or to brain overgrowth (**Figure 5C**).

215

## 216 Discussion

217 In this study, we investigated the mechanisms by which mutation in the *WDR81* gene leads  
218 to severe microcephaly in patients. We show that KO mouse recapitulates many features of the  
219 phenotype previously observed in patients and that the endosomal maturation function of WDR81 is  
220 critical for neocortex development. WDR81 is required for endosomal clearance of internalized  
221 EGFR and normal activation of the mitogenic MAPK signaling pathway. In the absence of WDR81,  
222 the proliferation rate of radial glial cells is affected, leading to reduced brain size. Importantly, cell  
223 death does not appear to contribute to this phenotype. Proliferation defects can be rescued by the  
224 expression of a megalencephaly-causing mutated cyclin D2, highlighting a tight functional link  
225 between these two pathologies.

226 Membrane trafficking has been poorly investigated in radial glial cells, albeit its predicted  
227 implication in many important processes including cargo polarized transport, secretion of  
228 extracellular matrix components, or endocytic processing of surface receptors for lysosomal  
229 degradation or recycling. We show here that the endosomal maturation machinery plays a critical role  
230 in the processing of internalized EGFR in RG cells, and is required for their proliferation.  
231 Neurogenesis depends on EGFR activity, with radial glial cells becoming responsive to EGF from  
232 mid-neurogenesis<sup>27,28</sup>. Accordingly, we find that WDR81<sup>-/-</sup> RG cells are specifically affected at E14,5  
233 and E16,5 stages of development. Why the proliferation rate of IPs was not affected is unclear but  
234 EGF is secreted into the cerebrospinal fluid from the choroid plexus and apical contact may be critical  
235 for responsiveness<sup>37,38</sup>. EGFR was previously reported to be asymmetrically inherited during radial  
236 glial cell division, generating a daughter cell with higher proliferative potential<sup>37</sup>. Later in  
237 development, EGFR also acts as an important regulator of astrocyte differentiation<sup>39</sup>. Our data point  
238 to the intracellular processing of EGFR as an important level of control for the regulation of

239 proliferation in radial glial cells. WDR81 is likely to affect the trafficking of other cargos<sup>40</sup>, which  
240 may also impact cell radial glial cell proliferation. Moreover, the trafficking of neuronal cargoes, such  
241 as adhesion molecules, is likely to lead to the altered neuronal positioning observed in KO mice, and  
242 to the lissencephaly phenotype in human.

243 In principle, microcephaly can be the consequence of premature progenitor differentiation,  
244 reduced proliferation rates, or cell death. While centrosomal defects leading to apoptosis have been  
245 described, reduced proliferations rates have received little experimental support<sup>16</sup>. In mouse, RG cells  
246 produce eight to nine neurons during a short neurogenic period, before differentiating<sup>2</sup>. We show here  
247 that *WDR81* mutation does not affect the modes of division of RG cells nor cell survival, but act  
248 solely through a reduction of their proliferation rate, leading to reduced brain size. This highlights the  
249 absence of compensatory mechanisms in the developing neocortex, where all neurons must be  
250 produced in a defined temporal window. During corticogenesis, G1 lengthening is associated with  
251 increased neurogenic divisions at the expense of symmetric amplifying divisions<sup>41,42</sup>. We did not  
252 detect such cell fate changes in *WDR81*<sup>-/-</sup> brains. This is likely due to the fact that the proliferation  
253 rate of mutant RG cells is only affected at a stage where the vast majority of cells already perform  
254 neurogenic divisions<sup>1</sup>. At the macroscopic level, microcephaly and megalencephaly can appear as  
255 opposite phenotypes. However, whether they can originate from related underlying causes at the  
256 molecular level is unclear. We show here that microcephaly and megalencephaly can be due to  
257 opposite on the proliferation rates of RG cells, and can therefore be viewed as two sides of the same  
258 coin.

259

260

## 261 **Materials and Methods**

262

### 263 **Animals**

264 All experiments involving mice were carried out according to the recommendations of the European  
265 Community (2010/63/UE). The animals were bred and cared for in the Specific Pathogen Free (SPF)  
266 Animal Facility of Institut Curie (agreement C 75-05-18). All animal procedures were approved by  
267 the ethics committee of the Institut Curie CEEA-IC #118 and by French Ministry of Research (2016-  
268 002.

269

### 270 **Guide RNA selection and preparation**

271 gRNA sequences targeting exon 1 of *WDR81* have been identified and selected using the online  
272 software CRISPOR ([crispor.tefor.net](http://crispor.tefor.net)). Forward and reverse oligonucleotides were annealed and



273 cloned into px330 plasmid. To generate Cas9 mRNA and gRNA, *in vitro* transcriptions were  
274 performed on the Cas9 pCR2.1-XL plasmid and gRNA plasmids, using the mMACHINE  
275 mMACHINE T7 ULTRA kit and the MEGashortscript T7 kit (Life Technologies), respectively.  
276 Cas9 mRNA and sgRNAs were then purified using the MEGAclear Kit (Thermo Fisher Scientific)  
277 and eluted in RNase-free water. The gRNA and Cas9mRNA quality were evaluated on agarose gel.  
278

### 279 **Generation of WDR81 Knock-Out mice**

280 Eight-week-old B6D2F1 (C57BL/6J × DBA2) females from Charles River France, were  
281 superovulated by intraperitoneal (i.p.) administration of 5 IU of Pregnant Mare Serum Gonadotropin  
282 followed by an additional i.p. injection of 5 IU Human Chorion Gonadotropin 48 h later. Females  
283 were mate to a stud male of the same genetic background. Cytoplasmic microinjection was performed  
284 into mouse fertilized oocytes using Cas9 mRNA and sgRNA at 100 ng/μl and 50 ng/μl, respectively  
285 in Brinster buffer (10 mM Tris-HCl pH 7.5; 0.25 mM EDTA). Microinjected zygotes were cultured  
286 in Cleave medium (Cook, K-RVCL-50) at 37°C under 5% CO<sub>2</sub> and then implanted at one cell stage  
287 into infundibulum of E0.5 NMRI pseudo-pregnant females (25-30 injected zygotes per female).  
288 According to the genotyping strategy, 3 mice showed modified allele out of a total of 22 pups. The  
289 founders were then backcrossed to C57BL6/J.

290

### 291 **Genotyping WDR81<sup>-/-</sup> animals**

292 Mice DNA was extracted from a piece of hear (adult) or tail (dissected embryos), put at 96 degrees  
293 in lysis tampon overnight. The DNA was then amplified via PCR using WDR81 specific primers: for  
294 KO1 Forward: GGCGGAAAGTGGTTCTTACA, Reverse : AGCCACCTCCTGCATGAACC; for  
295 KO2 Forward: GGCTTGTAGTGGTTCTGTAC , Reverse : GATCCTTCTGCATTCCAA. For KO1  
296 the amplicon was purified using the nucleospin purification kit (Machenery and Nagel) and then  
297 exposed to the restriction enzyme AfeI (New England Bioscience). The restriction enzyme only cuts  
298 the mutant DNA giving rise to two DNA pieces of 200bp. For KO2, the amplicon was sanger-  
299 sequenced using the GATC-Eurofins platform.

300

### 301 **Real-time reverse-transcription PCR**

302 Wild type and WDR81<sup>-/-</sup> cortices were dissected at E14.5 in 1 ml of TRIZOL (Thermo Fisher  
303 15596026). The mRNA was isolated as follows: TRIZOL + sample solution was exposed to  
304 chlorophorm for 7 minutes at room temperature and centrifuged at 15.000g for 30 min at 4 degrees.  
305 The translucent solution formed was then transferred in 1ml of isopropanol, incubated 7 minutes at  
306 room temperature and centrifuged at 4 degrees 10.000g. The pellet of nucleic acid formed was then

307 washed in ethanol 70% and centrifuged 5 min at 10.000g at 4 degrees. The pellet was then  
308 resuspended in water. The nucleic acids solution was purified from DNA using TURBO DNA-free  
309 Kit (Thermofisher). The mRNA obtained was then retrotranscribed using the RT reverse transcription  
310 Kit (Thermofisher). Real time RT-PCR was performed using the qPCR Master Mix kit  
311 (Thermofisher) and the WDR81 Forward/Reverse primers; GAPDH gene was used for internal  
312 control and for normalization. Primers used for WDR81 isoform 1 are forward:  
313 AGTGGATCCTTCAGACAGCC, Reverse : GAAGCCAGCCACAACACTC. Primers used for  
314 WDR81 isoform 2 are Forward: AGTGGATCCTTCAGACAGCC, Reverse :  
315 CTGACTTGTAGTGGTGCGTG

316

### 317 ***In utero* electroporation of mouse embryonic cortex**

318 Pregnant mice at embryonic day 13.5 or 14.5 were anesthetized with isoflurane gas, and injected  
319 subcutaneously first with buprenorphine (0.075mg/kg) and a local analgesic, bupivacaine (2 mg/kg),  
320 at the site of the incision. Lacrinorm gel was applied to the eyes to prevent dryness/irritation during  
321 the surgery. The abdomen was shaved and disinfected with ethanol and antibiotic swabs, then opened,  
322 and the uterine horns exposed. Plasmid DNA mixtures were used at a final concentration of 1  $\mu\text{g}/\mu\text{l}$   
323 per plasmid, dyed with Fast Green and injected into the left lateral ventricle of several embryos. The  
324 embryos were then electroporated through the uterine walls with a NEPA21 Electroporator  
325 (Nepagene) and a platinum plated electrode (5 pulses of 50 V for 50 ms at 1 second intervals). The  
326 uterus was replaced and the abdomen sutured. The mother was allowed to recover from surgery and  
327 supplied with painkillers in drinking water post-surgery. Electroporated brain were harvested at E16.5  
328 and E17.5.

329

### 330 **Immunostaining of brain slices**

331 Mouse embryonic brains were dissected out of the skull, fixed in 4% Pfa for 2 hours, and 80  $\mu\text{m}$ -  
332 thick slices were prepared with a Leica VT1200S vibratome in PBS. Slices were boiled in citrate  
333 sodium buffer (10mM, pH6) for 20 minutes and cooled down at room temperature (antigen retrieval).  
334 Slices were then blocked in PBS-Triton X100 0.3%-Donkey serum 2% at room temperature for 2  
335 hours, incubated with primary antibody overnight at 4°C in blocking solution, washed in PBS-Tween  
336 0.05%, and incubated with secondary antibody overnight at 4°C in blocking solution before final  
337 wash and mounting in aquapolymount. Image analysis, modifications of brightness and contrast were  
338 carried out with Fiji. Statistical analysis was carried out with Prism. Figures were assembled in  
339 Affinity Designer.

340

341 **Brdu/Edu labelling**

342 For BrDU labelling experiments, BrDU (Invitrogen B23151) was injected at 50mg/kg  
343 intraperitoneally 30 min prior to harvesting embryos. For BrDU/EDU labelling experiments, BrDU  
344 was injected at 50mg/kg intraperitoneally 4 hours prior to harvesting embryos, and EdU  
345 (Thermofisher Click-iT EdU Alexa Fluor 555) was injected at 50mg/kg 30 min prior to harvesting  
346 embryos. After fixation, brain slices were incubated in 2N HCL for 30 min at 37 degrees and then  
347 washed 3 times with PBS prior to immunostaining.

348

349 **WDR81 patient cells and immunostaining**

350 Control and WDR81 mutant primary fibroblasts were provided by Institut Imagine, Paris. The  
351 genotype of patient 1 cells was compound heterozygote 1882C>T/3713C>G and the genotype of  
352 patient 2 cells was compound heterozygote 1582C>T/4036\_4041dup. Cells were grown in  
353 OPTIMEM + 10%FBS at 37 degrees in humid air containing 5% CO<sub>2</sub>. Fibroblast were fixed in 4%  
354 paraformaldehyde for 20 min, treated with 50mM NH<sub>4</sub>Cl for 10min, washed three times with PBS  
355 and left in a blocking solution (PBS 1% donkey serum 0.1% Triton X) for 30 min. Cells were then  
356 incubated 1 hour at room temperature with primary antibodies, washed three times in PBS and  
357 incubate for 45 min at room temperature in blocking solution with Alexa Fluor coupled secondary  
358 antibodies. Cells were then washed and mounted.

359

360 **Antibodies**

361 Primary antibodies used: rabbit anti CUX-1 (Santa Cruz, discontinued), mouse anti Ctip-2 (Abcam  
362 ab18465), rabbit anti Pax6 (Biolegend 901301), Sheep anti TBR2/EOMES (R&D system AF6166),  
363 rabbit anti NEUN (Abcam ab177487), goat anti Phospho Histone3 (Santa Cruz SC-12927), rabbit  
364 anti BRDU (Abcam AB152095), rabbit cleaved caspase-3(CST 3661), rabbit anti Ki67 (abcam  
365 ab15580), rabbit anti EGFR (CST 4267),mouse anti p-ERK (CST 9106), rabbit anti GAPDH (Sigma  
366 AldrichG9545) and mouse anti EEA-1 (BD biosciences 610457). Secondary antibodies used: donkey  
367 Alexa Fluor 488 anti-mouse, anti-rabbit, anti-goat (Jackson laboratories 715-545-150, 711-165-152,  
368 715-605-152), donkey Alexa Fluor 555 anti-mouse, anti-rabbit, anti-goat (Jackson laboratories 715-  
369 545-150, 711-165-152, 715-605-152), donkey Alexa Fluor 647 anti-mouse, anti-rabbit, anti-goat  
370 (Jackson laboratories 715-545-150, 711-165-152, 715-605-152).

371

372 **Expression constructs and shRNAs**

373 For WDR81 knockdown experiments, WDR81 shRNA was provided by Genecopoeia<sup>TM</sup>. The small  
374 interfering RNA sequence was ggagataagcaattggacttc and was cloned in psi-mU6.1 vector

375 coexpressing mcherryFP. For WDR91 knockdown experiments shRNA was provided by Tebu-bio  
376 (217MSH024100-mU6). For p62 knockdown experiments shRNA was provided by Tebu-bio  
377 (217CS-MSH079315-mU6-01). Constructs were co-injected with GFP-pCagIG (Addgene 11159) at  
378 a concentration of 1ug/ul. Plasmids were introduced in the *in vivo* developing cortex by  
379 intraventricular injection and electroporation. For WDR81 rescue experiments, Cyclin D2 and Cyclin  
380 D2Thr280Ala were synthesized *in vitro* (Genescript). They were then cloned into GFP-pCagIG  
381 (Addgene 11159) after digestion by restriction enzymes EcoRI and EcoRV.

382

### 383 **EGF pulse assay and EGF<sup>555</sup> uptake assay**

384 For EGF pulse assay, fibroblast cultures were EGF starved for two hours before the assay. EGF was  
385 added directly to the culture medium at 0,1mg/ml. Cells were then harvested at 0, 5, 15,30 ,60 ,120  
386 minutes and processed for protein extraction. Proteins were then mixed with 4x Leammli (Biorad)  
387 and BME solution and used for Western Blot analysis. For EGF<sup>555</sup> pulse assay, fibroblast cells were  
388 cultivated on glass coverslips; cells were starved for 24 hours and then exposed to at 0,1mg/ml EGF<sup>555</sup>  
389 (Thermofisher E35350). Cells were fixed in paraformaldehyde 4% at 15, 30, 60, 120, 360 min and  
390 used for immunostaining.

391

392

### 393 **Acknowledgments**

394 We acknowledge Institut Curie, member of the French National Research Infrastructure France-  
395 BioImaging (ANR10-INBS-04) and the Nikon BioImaging Center (Institut Curie, France). We thank  
396 Renata Basto, Veronique Marthiens, Iva Simeonova, Cedric Delevoye (I. Curie), Fiona Francis  
397 (IFRM), for helpful discussions and critical reading of the manuscript. J.A.C. was funded by the IC3i  
398 Institut Curie doctoral program founded by the European Union's Horizon 2020 research and  
399 innovation program under the Marie Sklodowska-Curie actions grant agreement and from Fondation  
400 de la Recherche Medicale (FRM). A.D.B. is an Inserm researcher. This work was supported by the  
401 CNRS, I. Curie, the Ville de Paris "Emergences" program, Labex CelTisPhyBio (11-LBX-0038) and  
402 PSL.

403

### 404 **Author contributions**

405 J.A.C. and A.D.B. conceived the project. J.A.C. & A.D.B. analyzed the data. J.A.C., J.B.B. & A.D.B.  
406 wrote the manuscript. J.A.C. and A.D.C. did most of the experimental procedures. J.A.C., L.D.M.  
407 and F.E.M. created the mutant mouse lines. D.A. supervised the mouse mutant colonies and

408 performed all the crossings. L.C. and J.A.C. set up *in utero* electroporation experiments. N.B.B.  
409 provided biological samples of the affected patients A.D.B. supervised the project.

410

411

## 412 **Figure legends**

413

### 414 **Figure 1. WDR81 KO mice display reduced brain size and altered neuronal positioning**

415 **A.** Schematic representation of mouse WDR81 isoforms and predicted structure. **B.** Quantification  
416 of WDR81 isoforms 1 and 2 mRNA levels in WT and WDR81<sup>-/-</sup> E14.5 cortices (n = 3 brains per  
417 genotype). Isoform 1 (ISO1) is the dominant isoform and its levels are strongly reduced in WDR81<sup>-/-</sup>  
418 cortices. **C.** WDR81<sup>-/-</sup> postnatal day 7 brains are microcephalic and display reduced cortical surface  
419 area as compared to WT brains. **D.** DAPI staining of P7 WT and WDR81<sup>-/-</sup> cross sections reveals  
420 reduced cortical thickness in mutants. **E.** Quantification of hemisphere areas in P7 WT and KO1  
421 brains (n = 4 brains per genotype). **F.** Quantification of cortical thickness in P7 WT, KO1 and KO2  
422 brains (n = 3 brains per genotype). **G.** CUX-1 staining in P7 WT and WDR81<sup>-/-</sup> cortices.  
423 Quantification of CUX1<sup>+</sup> neuronal positioning reveals dispersion throughout the thickness of the  
424 neocortex (n = 3 brains per genotype). **H.** CTIP-2 staining in P7 WT and WDR81<sup>-/-</sup> cortices.  
425 Quantification does not neuronal positioning defects, with CTIP-2<sup>+</sup> neurons still concentrated in the  
426 third bin (n = 3 brains per genotype). **(G, H)** WT and mutant cortices were divided into 5 bins of  
427 equal size to measure neuronal relative positioning, independently of cortical thickness. \*\*p<0,01;  
428 \*\*\*p<0,001; \*\*\*\*p<0,0001 by unpaired t-tests.

429

### 430 **Figure 2. WDR81 KO alters radial glial progenitor proliferation**

431 **A.** PAX6 and PH3 double staining in E14.5 WT and WDR81<sup>-/-</sup> brains. Quantification of the mitotic  
432 index of PAX6<sup>+</sup> cells reveals decreased proliferation of WDR81<sup>-/-</sup> radial glial progenitors at E14.5  
433 and E16.5 (n = 5-8 brains per condition). **B.** TBR2 and PH3 double staining in E14.5 WT and  
434 WDR81<sup>-/-</sup> brains. Quantification of the mitotic index of TBR2<sup>+</sup> cells indicates that proliferation of  
435 WDR81<sup>-/-</sup> intermediate progenitors is not affected (n = 3 brains per condition). **C.** Schematic  
436 representation of the BrdU labeling experimental approach and Pax6 and BrdU staining in E14.5 WT  
437 and WDR81<sup>-/-</sup> brains. **D.** Quantification of the percentage of BrdU<sup>+</sup> PAX6<sup>+</sup> out of total PAX6 cells  
438 reveals increased number of cells in S phase in WDR81<sup>-/-</sup> radial glial progenitors at E14.5 (n = 3  
439 brains per condition). **E.** Schematic representation of the BrdU / EdU double labeling experimental  
440 approach and PAX6, BrdU and EdU staining in E14.5 WT and WDR81<sup>-/-</sup> brains. **F.** Quantification  
441 of the percentage of of BrdU<sup>+</sup> EdU<sup>-</sup> PAX6<sup>+</sup> out of the total BrdU<sup>+</sup> PAX6<sup>+</sup> cells reveals a decreased

442 proportion of cells that exited S phase following BrdU injection in WDR81<sup>-/-</sup> radial glial progenitors  
443 at E14.5 (n = 3 brains per condition). **G.** Staining for the cell fate markers PAX6 (radial glial  
444 progenitors), TBR2 (Intermediate progenitors) NEUN (Neurons) in E14.5 WT and WDR81<sup>-/-</sup> brains,  
445 and quantification of cell fate distribution at E12.5, E14.5 and E16.5 (n = 3-5 brains per condition).  
446 **H.** Staining for Cleaved Caspase-3 (CC3) and DAPI in E14.5 WT and WDR81<sup>-/-</sup> brains, showing an  
447 absence of apoptosis induction. \*p<0,05; \*\*p<0,01; \*\*\*p<0,001 by unpaired t-tests.

448

### 449 **Figure 3. Reduced proliferation and EGFR signaling in WDR81 patient cells**

450 **A.** PH3 and DAPI staining in control and WDR81 patient fibroblasts **B.** Quantification of the  
451 percentage of PH3+ cells reveals decreased mitotic index in patient cells (n = 3). **C.** Ki67 and DAPI  
452 staining in control and WDR81 patient fibroblasts. **D.** Quantification of the percentage of Ki67+ cells  
453 shows decreased proliferation in patient cells (n = 3). **E.** Western Blot for EGFR in control and  
454 WDR81 patient fibroblasts. **F.** Quantification reveals a strong reduction of EGFR levels in patient  
455 cells (n = 5). **G.** Time course of EGFR and P-ERK levels in control and WDR81 patient fibroblasts  
456 following an EGF pulse. **H.** Quantification of EGFR levels, normalized to control levels at T0 (n =  
457 5). **I.** Quantification of P-ERK levels, normalized to control levels at T5 (n = 5). **J.** Western Blot for  
458 EGFR in control and WDR81 patient fibroblasts at steady state (+EGF) and cultivated for 24H in the  
459 absence of EGF. **K.** Quantification reveals a restoration of EGFR levels following starvation (n = 3)..  
460 \*p<0,05; \*\*p<0,01; \*\*\*p<0,001; \*\*\*\*p<0,0001 by unpaired t-tests.

461

### 462 **Figure 4. WDR81 is required for endosomal trafficking of EGFR**

463 **A.** Expression of control shRNA and shRNA-mediated knockdown constructs for WDR81, WDR91  
464 and p62. Plasmids were delivered by in utero electroporation at E13.5 and analysis was performed at  
465 E16.5. Ventricular Zone and Sub-Ventricular Zone (VZ +SVZ), Intermediate Zone (IZ) and Cortical  
466 Plate (CP). **B.** Quantification of electroporated cell distribution reveals major accumulation in the IZ  
467 following WDR81 and WDR91 knockdown (n = 4 brains per condition). **C.** Ventricular zone of E14.5  
468 WT and WDR81<sup>-/-</sup> mice cortices stained for EEA1 and Actin. **D.** Control and WDR81 patient  
469 fibroblasts stained for EEA1. **E.** Quantification of individual EEA1+ early endosomes in WT and  
470 WDR81<sup>-/-</sup> VZ reveals increased size in mutant brains (n = 3 brains per condition). **F.** Quantification  
471 of individual EEA1+ early endosomes in control and WDR81 patient fibroblasts reveals increased  
472 size in mutant cells (n = 20 cells per condition). **G.** EGF<sup>555</sup> uptake assay in control and WDR81  
473 patient fibroblasts, and stained for EEA1. **H.** Quantification of EGF<sup>555</sup> and EEA1 colocalization  
474 during EGF<sup>555</sup> uptake reveals prolonged colocalization between EGF and early endosomes in WDR81

475 patient cells (n = 28 cells per condition). \*p<0,05; \*\*p<0,01; \*\*\*p<0,001; \*\*\*\*p<0,0001 by unpaired  
476 t-test (A & H) and Mann-Whitney tests (E & F).

477

478 **Figure 5. Undegradable Cyclin D2<sup>Thr280Ala</sup> rescues WDR81<sup>-/-</sup> proliferation index**

479 **A.** Expression of Cyclin D2, Cyclin D2<sup>Thr280Ala</sup> and empty vector in WT and WDR81<sup>-/-</sup> brains.  
480 Constructs were *in utero* electroporated at E14.5, and brains were fixed at 16.5 and stained for PAX6  
481 and PH3. **B.** Quantification of the percentage of mitotic (PH3+) electroporated radial glial cells  
482 (PAX6+) out of total electroporated radial glial cells reveals rescue of mitotic index in WDR81<sup>-/-</sup> cells  
483 expressing Cyclin D2<sup>Thr280Ala</sup> (n = 3 brains per condition). **C.** Model. WDR81 loss of function leads  
484 to reduced activation of the MAPK signaling pathway downstream of EGFR, to reduced radial glial  
485 progenitor proliferation, and to microcephaly. Gain of function in the Pi3K-AKT pathway or  
486 stabilizing mutations in Cyclin D2 lead to increased radial glial progenitor proliferation, and to  
487 megalencephaly. Cyclin D2 mutants can rescue proliferation defects in WDR81<sup>-/-</sup> brains, indicating  
488 that these two pathologies can arise from opposite effects on the proliferation rates of radial glial  
489 progenitor. \*p<0,05; \*\*p<0,01 by unpaired t-tests.

490

491 **Supplemental figure 1. Genotypes and survival and WDR81<sup>-/-</sup> mice.**

492 **A.** Sequencing of WDR81 knock-out animals reveals a 4 base pair deletion in KO1 and an 8 base pair  
493 deletion in KO2, both leading to frameshifts and premature STOP codons. **B.** Rate of WDR81<sup>-/-</sup>  
494 embryos and pups recovered throughout time. The expected rate is 25% (dashed line). By P21, no  
495 mutant was detected.

496

497 **Supplemental figure 2. Quantification of EGFR levels and P-ERK levels for Control-2 and**  
498 **WDR81 patient-2 cell lines.**

499 **A.** Quantification of EGFR levels, normalized to control levels at T0 for Control-2 and WDR81  
500 patient-2 cell lines (n = 5). **B.** Quantification of P-ERK levels, normalized to control levels at T5 for  
501 Control-2 and WDR81 patient-2 cell lines (n = 5). \*p<0,05; \*\*p<0,01; \*\*\*p<0,001; \*\*\*\*p<0,0001  
502 by unpaired t-tests.

503

504

505

506

507

508

509 **References**

510

- 511 1. Uzquiano, A. *et al.* Cortical progenitor biology: key features mediating proliferation versus  
512 differentiation. *J Neurochem* **146**, 500–525 (2018).
- 513 2. Gao, P. *et al.* Deterministic progenitor behavior and unitary production of neurons in the  
514 neocortex. *Cell* **159**, 775–788 (2014).
- 515 3. Homem, C. C. F., Repic, M. & Knoblich, J. A. Proliferation control in neural stem and  
516 progenitor cells. *Nat Rev Neurosci* **16**, 647–659 (2015).
- 517 4. Pirozzi, F., Nelson, B. & Mirzaa, G. From microcephaly to megalencephaly: determinants of  
518 brain size. *Dialogues Clin Neurosci* **20**, 267–282 (2018).
- 519 5. Jayaraman, D., Bae, B.-I. & Walsh, C. A. The Genetics of Primary Microcephaly. *Annu Rev*  
520 *Genomics Hum Genet* **19**, 177–200 (2018).
- 521 6. Insolera, R., Bazzi, H., Shao, W., Anderson, K. V. & Shi, S.-H. Cortical neurogenesis in the  
522 absence of centrioles. *Nature Publishing Group* **17**, 1528–1535 (2014).
- 523 7. Marthiens, V. *et al.* Centrosome amplification causes microcephaly. *Nat Cell Biol* **15**, 731–  
524 740 (2013).
- 525 8. Lizarraga, S. B. *et al.* Cdk5rap2 regulates centrosome function and chromosome segregation  
526 in neuronal progenitors. *Development* **137**, 1907–1917 (2010).
- 527 9. Johnson, M. B. *et al.* Aspm knockout ferret reveals an evolutionary mechanism governing  
528 cerebral cortical size. *Nature* **556**, 370–375 (2018).
- 529 10. Chen, J.-F. *et al.* Microcephaly disease gene Wdr62 regulates mitotic progression of  
530 embryonic neural stem cells and brain size. *Nature Communications* **5**, 3885–13 (2014).
- 531 11. Hu, W. F. *et al.* Katanin p80 regulates human cortical development by limiting centriole and  
532 cilia number. *Neuron* **84**, 1240–1257 (2014).
- 533 12. Kim, S. *et al.* The apical complex couples cell fate and cell survival to cerebral cortical  
534 development. *Neuron* **66**, 69–84 (2010).
- 535 13. Mao, H., McMahon, J. J., Tsai, Y.-H., Wang, Z. & Silver, D. L. Haploinsufficiency for Core  
536 Exon Junction Complex Components Disrupts Embryonic Neurogenesis and Causes p53-  
537 Mediated Microcephaly. *PLoS Genet* **12**, e1006282 (2016).
- 538 14. Gruber, R. *et al.* MCPH1 regulates the neuroprogenitor division mode by coupling the  
539 centrosomal cycle with mitotic entry through the Chk1-Cdc25 pathway. *Nat Cell Biol* **13**,  
540 1325–1334 (2011).
- 541 15. Reynolds, J. J. *et al.* Mutations in DONSON disrupt replication fork stability and cause  
542 microcephalic dwarfism. *Nat Genet* **49**, 537–549 (2017).
- 543 16. Lehtinen, M. K. *et al.* The cerebrospinal fluid provides a proliferative niche for neural  
544 progenitor cells. *Neuron* **69**, 893–905 (2011).
- 545 17. Juanes, M. *et al.* Three novel IGF1R mutations in microcephalic patients with prenatal and  
546 postnatal growth impairment. *Clin Endocrinol* **82**, 704–711 (2014).
- 547 18. Dobyns, W. B. & Mirzaa, G. M. Megalencephaly syndromes associated with mutations of  
548 core components of the PI3K-AKT–MTOR pathway: PIK3CA, PIK3R2, AKT3, and MTOR.  
549 *Am J Med Genet C Semin Med Genet* **181**, 582–590 (2019).
- 550 19. Mirzaa, G. M. & Poduri, A. Megalencephaly and hemimegalencephaly: breakthroughs in  
551 molecular etiology. *Am J Med Genet C Semin Med Genet* **166C**, 156–172 (2014).
- 552 20. Kang, M. & Lee, Y.-S. The impact of RASopathy-associated mutations on CNS development  
553 in mice and humans. *Mol Brain* **12**, 96–117 (2019).
- 554 21. Rauen, K. A. The RASopathies. *Annu Rev Genomics Hum Genet* **14**, 355–369 (2013).
- 555 22. Li, Y. *et al.* Induction of Expansion and Folding in Human Cerebral Organoids. *Cell Stem*  
556 *Cell* **20**, 385–396.e3 (2017).
- 557 23. Groszer, M. *et al.* Negative regulation of neural stem/progenitor cell proliferation by the Pten  
558 tumor suppressor gene in vivo. *Science* **294**, 2186–2189 (2001).



- 559 24. Hegedus, B. *et al.* Neurofibromatosis-1 regulates neuronal and glial cell differentiation from  
560 neuroglial progenitors in vivo by both cAMP- and Ras-dependent mechanisms. *Cell Stem*  
561 *Cell* **1**, 443–457 (2007).
- 562 25. Mirzaa, G. M. *et al.* De novo CCND2 mutations leading to stabilization of cyclin D2 cause  
563 megalencephaly-polymicrogyria-polydactyly-hydrocephalus syndrome. *Nat Genet* **46**, 510–  
564 515 (2014).
- 565 26. Sigismund, S., Avanzato, D. & Lanzetti, L. Emerging functions of the EGFR in cancer. *Mol*  
566 *Oncol* **12**, 3–20 (2018).
- 567 27. Threadgill, D. W. *et al.* Targeted disruption of mouse EGF receptor: effect of genetic  
568 background on mutant phenotype. *Science* **269**, 230–234 (1995).
- 569 28. Tropepe, V. *et al.* Distinct neural stem cells proliferate in response to EGF and FGF in the  
570 developing mouse telencephalon. *Dev Biol* **208**, 166–188 (1999).
- 571 29. Tomas, A., Futter, C. E. & Eden, E. R. EGF receptor trafficking: consequences for signaling  
572 and cancer. *Trends Cell Biol* **24**, 26–34 (2014).
- 573 30. Cullen, P. J. & Steinberg, F. To degrade or not to degrade: mechanisms and significance of  
574 endocytic recycling. *Nat Rev Mol Cell Biol* **19**, 679–696 (2018).
- 575 31. Stenmark, H. Rab GTPases as coordinators of vesicle traffic. *Nat Rev Mol Cell Biol* **10**, 513–  
576 525 (2009).
- 577 32. Liu, K. *et al.* Negative regulation of phosphatidylinositol 3-phosphate levels in early-to-late  
578 endosome conversion. *J Cell Biol* **212**, 181–198 (2016).
- 579 33. Cavallin, M. *et al.* WDR81 mutations cause extreme microcephaly and impair mitotic  
580 progression in human fibroblasts and Drosophila neural stem cells. *Brain* **140**, 2597–2609  
581 (2017).
- 582 34. Avraham, R. & Yarden, Y. Feedback regulation of EGFR signalling: decision making by  
583 early and delayed loops. *Nat Rev Mol Cell Biol* **12**, 104–117 (2011).
- 584 35. Liu, X. *et al.* The BEACH-containing protein WDR81 coordinates p62 and LC3C to promote  
585 autophagy. *J Cell Biol* **216**, 1301–1320 (2017).
- 586 36. Rivièrè, J.-B. *et al.* De novo germline and postzygotic mutations in AKT3, PIK3R2 and  
587 PIK3CA cause a spectrum of related megalencephaly syndromes. *Nat Genet* **44**, 934–940  
588 (2012).
- 589 37. Sun, Y., Goderie, S. K. & Temple, S. Asymmetric distribution of EGFR receptor during  
590 mitosis generates diverse CNS progenitor cells. *Neuron* **45**, 873–886 (2005).
- 591 38. Lehtinen, M. K. & Walsh, C. A. Neurogenesis at the Brain–Cerebrospinal Fluid Interface.  
592 *Annu Rev Cell Dev Biol* **27**, 653–679 (2011).
- 593 39. Beattie, R. *et al.* Mosaic Analysis with Double Markers Reveals Distinct Sequential  
594 Functions of Lgl1 in Neural Stem Cells. *Neuron* **94**, 517–533.e3 (2017).
- 595 40. Wang, M. *et al.* WDR81 regulates adult hippocampal neurogenesis through endosomal  
596 SARA-TGF $\beta$  signaling. *Mol. Psychiatry* **17**, 385–16 (2018).
- 597 41. Pilaz, L.-J. *et al.* Forced G1-phase reduction alters mode of division, neuron number, and  
598 laminar phenotype in the cerebral cortex. *Proc Natl Acad Sci USA* **106**, 21924–21929 (2009).
- 599 42. Lange, C., Huttner, W. B. & Calegari, F. Cdk4/cyclinD1 overexpression in neural stem cells  
600 shortens G1, delays neurogenesis, and promotes the generation and expansion of basal  
601 progenitors. *Cell Stem Cell* **5**, 320–331 (2009).
- 602

## Figure 1

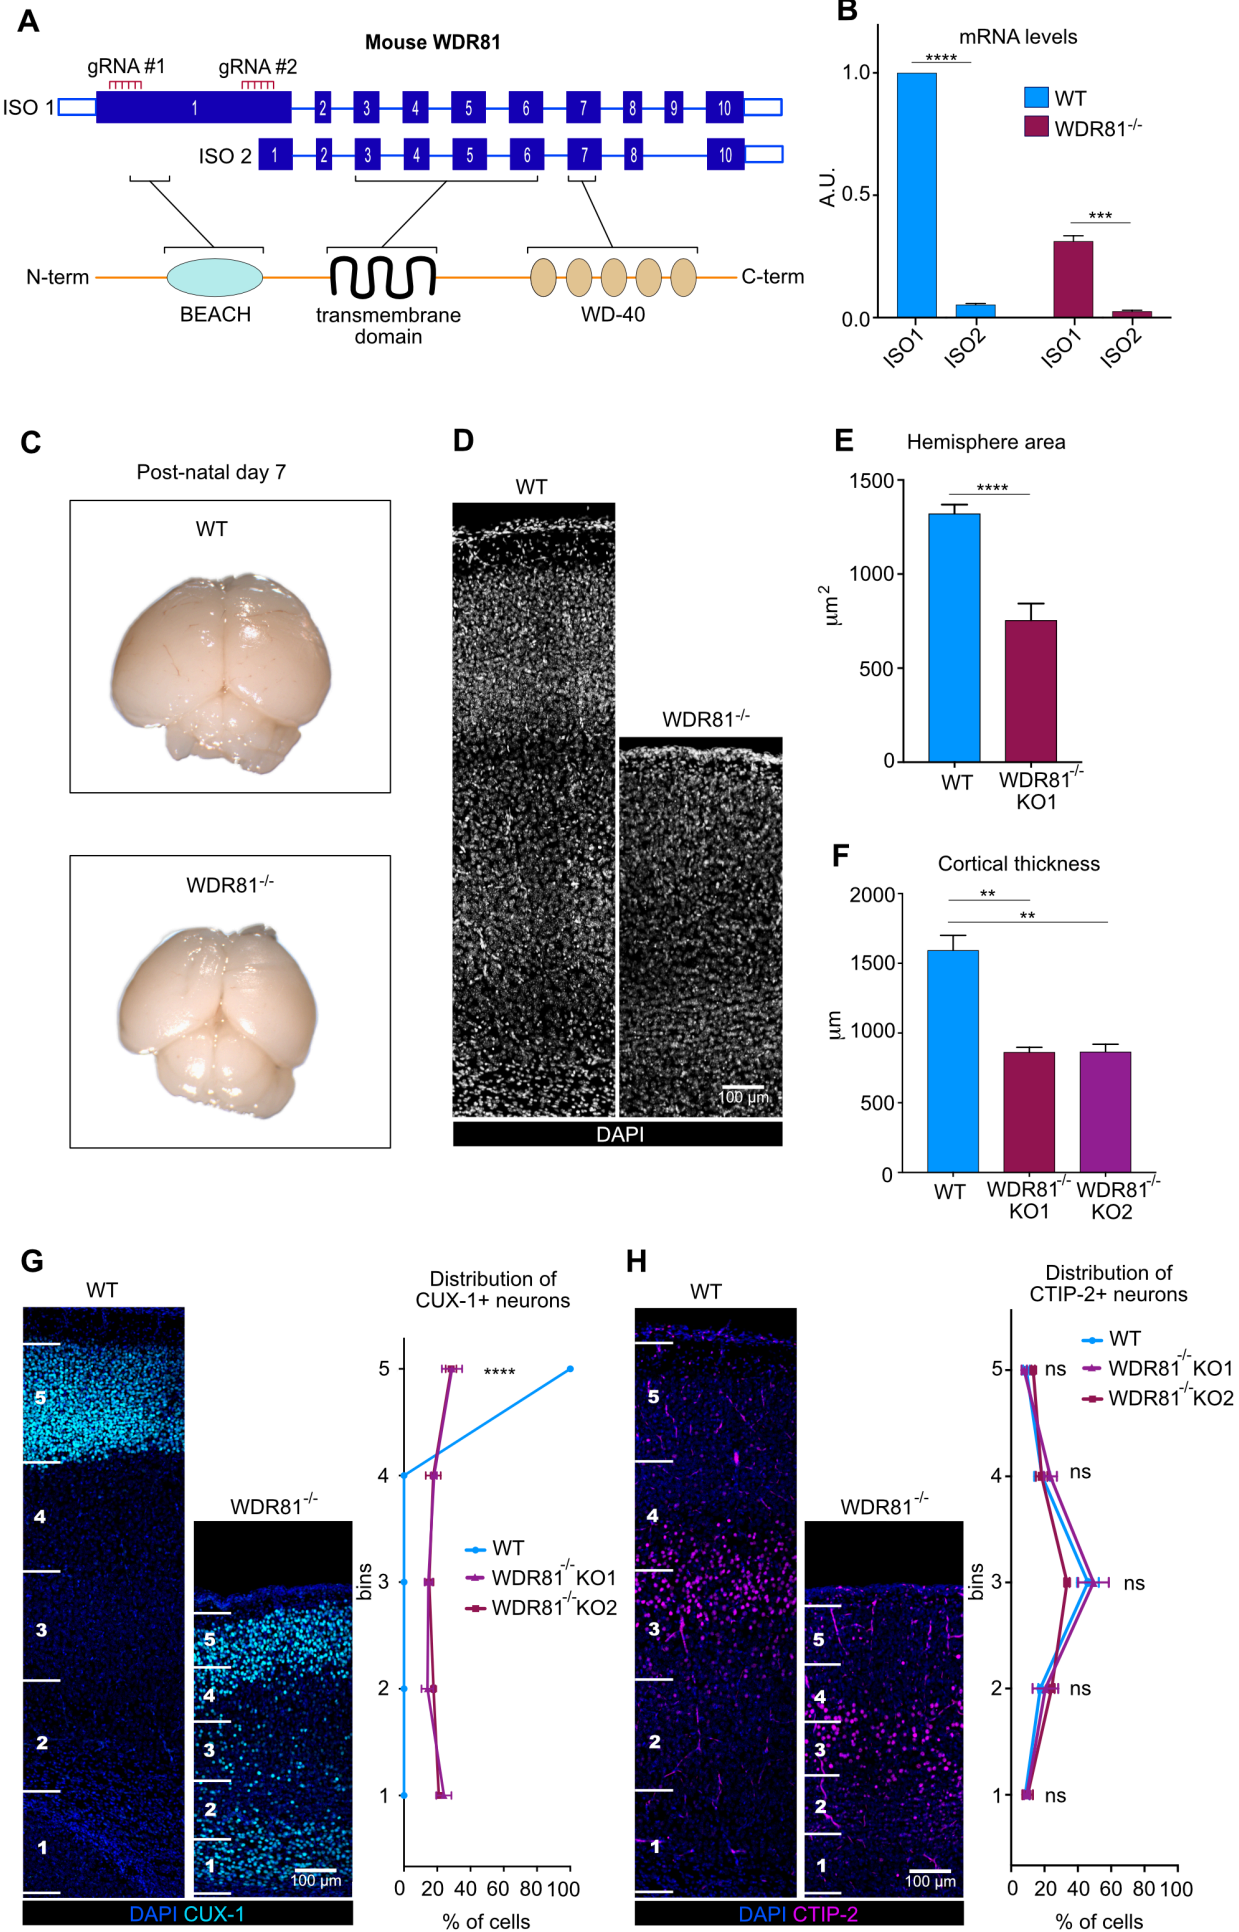

## Figure 2

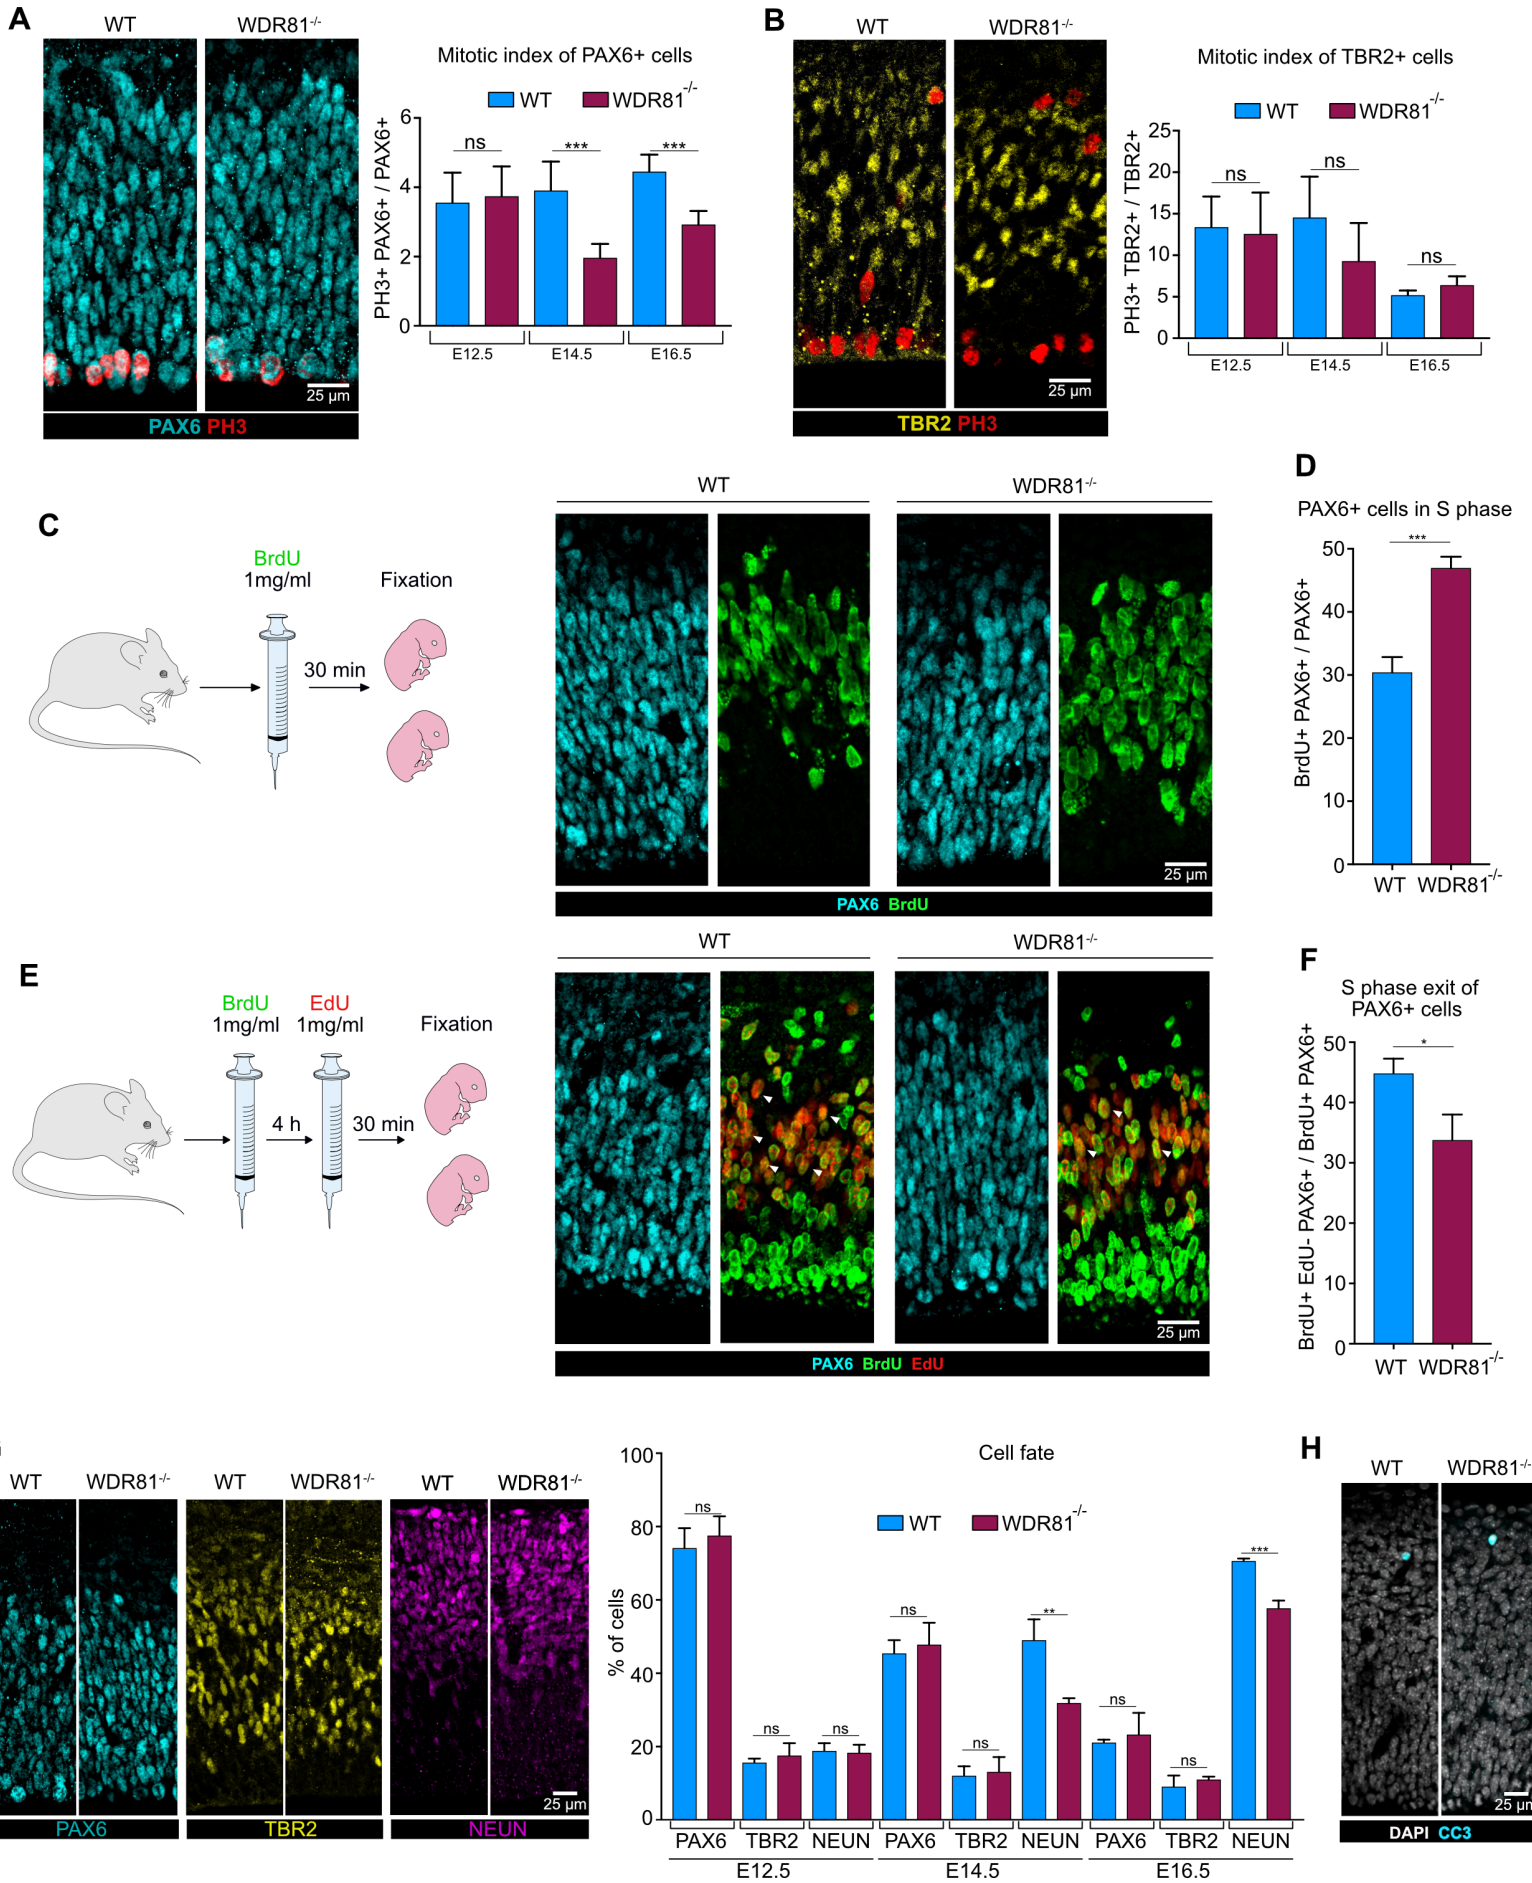

## Figure 3

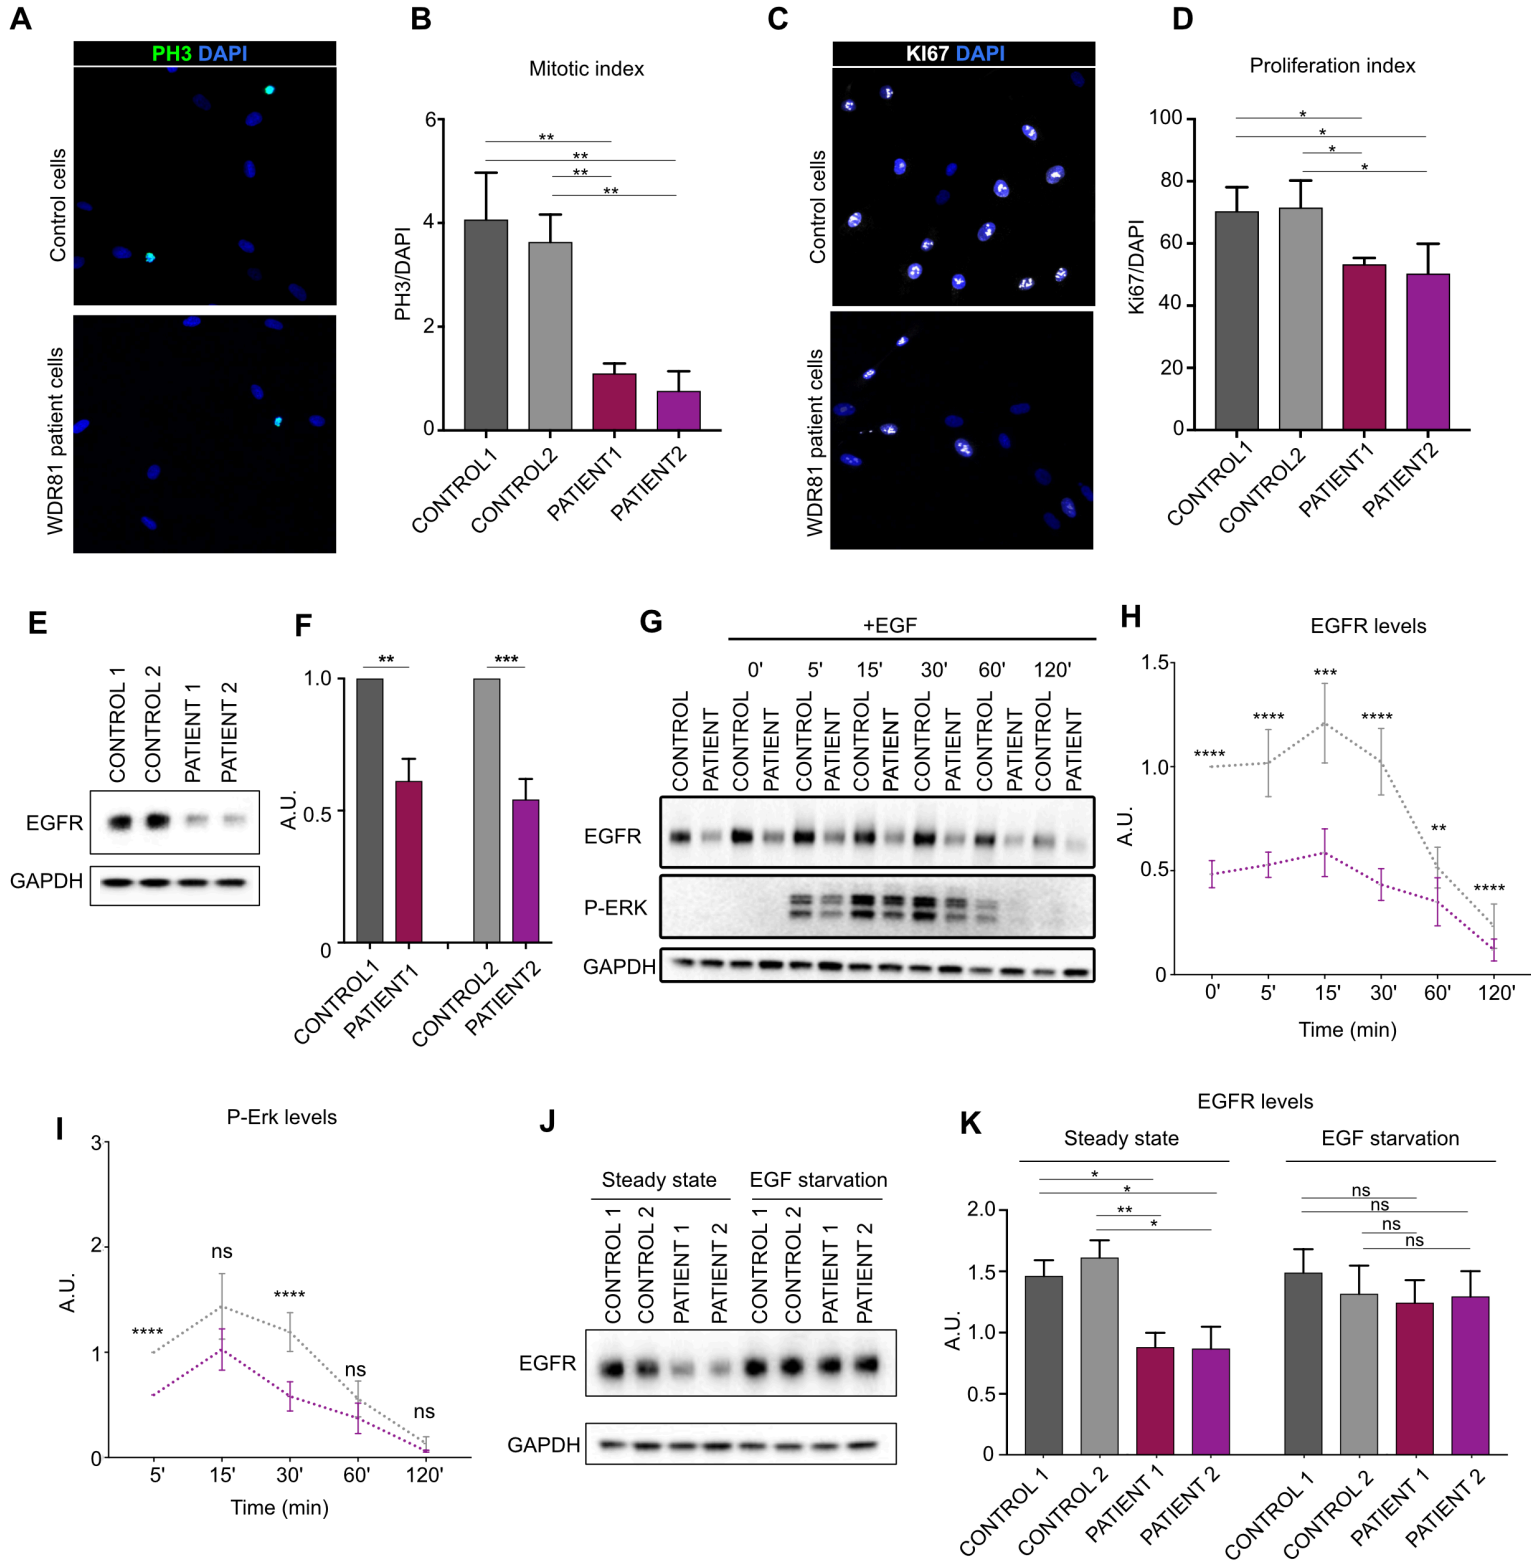

## Figure 4

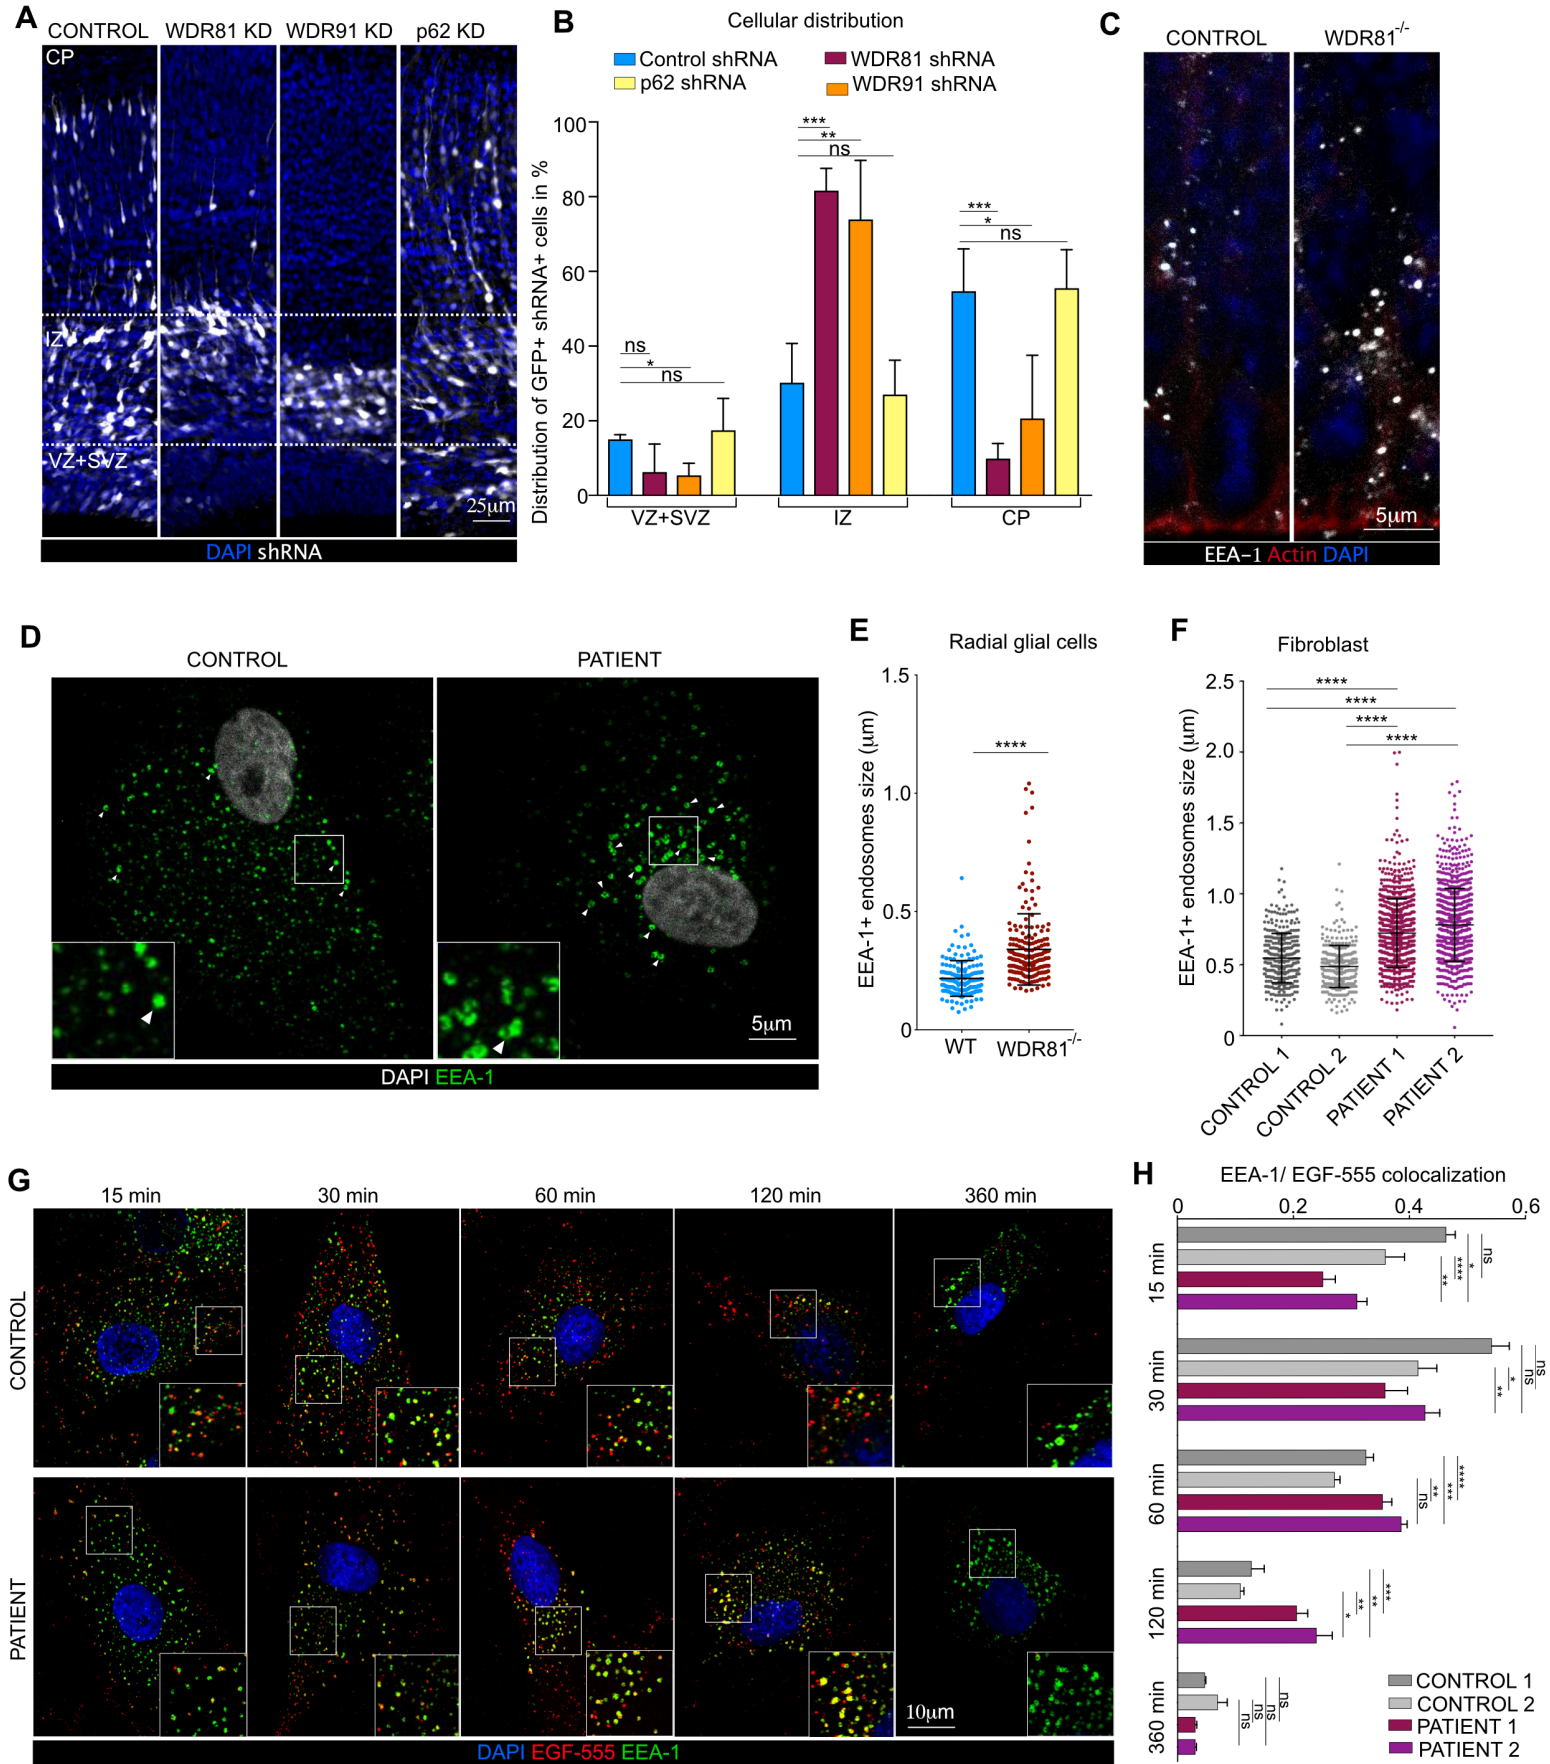

## Figure 5

A

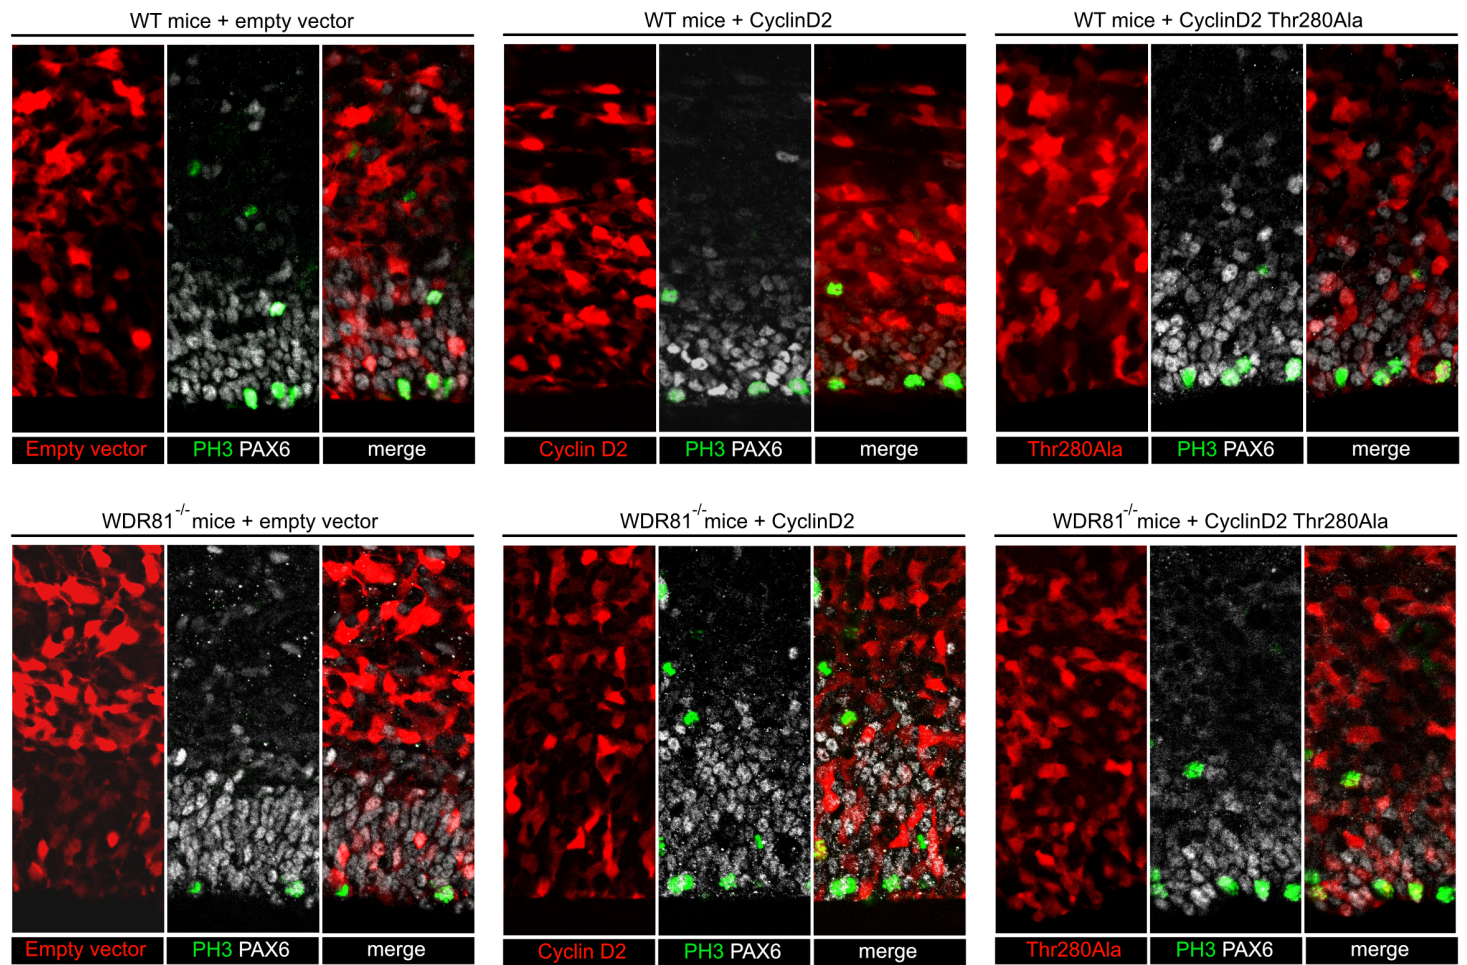

B

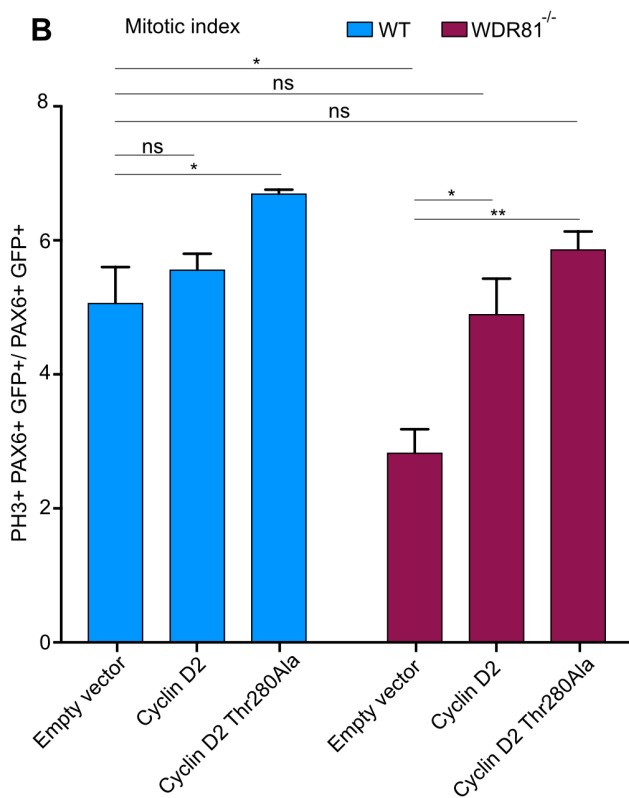

C

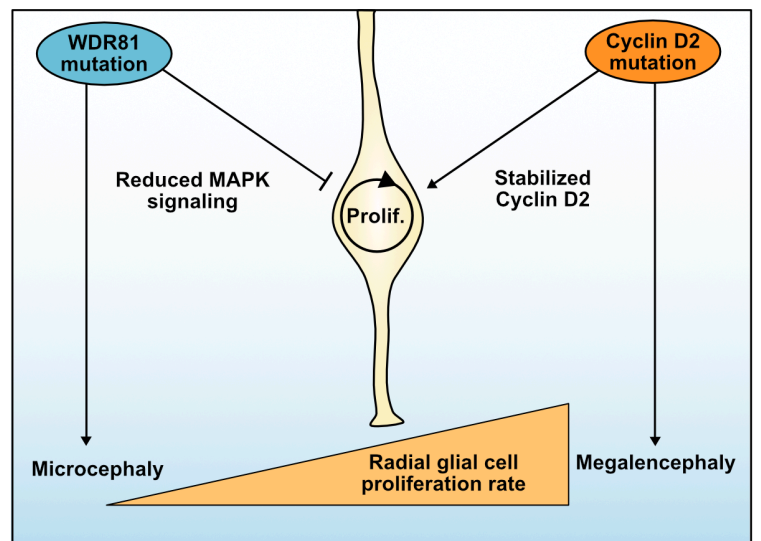

Source: https://www.biorxiv.org/content/10.1101/2020.08.17.254037v1.full.pdf
